# Supplementary material
Source: publisher figshare collection journal article supplement (https://acs.figshare.com/ndownloader/files/5119930)
Supplement: Supplementary file 1 [file 5119930]

data_CuCN01
_publ_requested_journal          Inorg.Chem.
_publ_contact_author_name        'Do-hyeon Kim'
_publ_contact_author_email       epstein823@naver.com
loop_
_publ_author_name
_publ_author_address
'Do-hyeon, Kim' ''
'Ja-eung, Koo' ''
'Youngkyu, Do' ''

_audit_creation_method           SHELXL
_chemical_name_systematic        ?
_chemical_name_common            CuCNpore
_chemical_formula_moiety         ?
_chemical_formula_structural     '[Cu(CN)4]2n[Cu(cyclam)]3n(H2O)5n'
_chemical_formula_analytical     ?
_chemical_formula_sum            'C38 H82 Cu5 N20 O5'
_chemical_formula_weight         1216.94
_chemical_melting_point          ?
_chemical_compound_source        ?

loop_
_atom_type_symbol
_atom_type_description
_atom_type_scat_dispersion_real
_atom_type_scat_dispersion_imag
_atom_type_scat_source
C C 0.0033 0.0016 'International Tables Vol C Tables 4.2.6.8 and 6.1.1.4'
H H 0.0000 0.0000 'International Tables Vol C Tables 4.2.6.8 and 6.1.1.4'
N N 0.0061 0.0033 'International Tables Vol C Tables 4.2.6.8 and 6.1.1.4'
O O 0.0106 0.0060 'International Tables Vol C Tables 4.2.6.8 and 6.1.1.4'
Cu Cu 0.3201 1.2651 'International Tables Vol C Tables 4.2.6.8 and 6.1.1.4'

_symmetry_cell_setting           triclinic
_symmetry_space_group_name_H-M   'P -1'
_symmetry_int_tables_number      2

loop_
_symmetry_equiv_pos_as_xyz
'x, y, z'
'-x, -y, -z'

_cell_length_a                   8.3589(11)
_cell_length_b                   13.478(2)
_cell_length_c                   14.828(2)
_cell_angle_alpha                66.895(2)
_cell_angle_beta                 77.916(3)
_cell_angle_gamma                85.939(3)
_cell_volume                     1502.3(3)
_cell_formula_units_Z            1
_cell_measurement_temperature    293(2)
_cell_measurement_reflns_used    ?
_cell_measurement_theta_min      ?
_cell_measurement_theta_max      ?

_exptl_crystal_description       ?
_exptl_crystal_colour            purple
_exptl_crystal_preparation       methanol
_exptl_crystal_size_max          ?
_exptl_crystal_size_mid          ?
_exptl_crystal_size_min          ?
_exptl_crystal_density_meas      ?
_exptl_crystal_density_diffrn    1.345
_exptl_crystal_density_method    ?
_exptl_crystal_F_000             635
_exptl_absorpt_coefficient_mu    1.793
_exptl_absorpt_correction_type   empirical
_exptl_absorpt_correction_T_min  ?
_exptl_absorpt_correction_T_max  ?

_exptl_special_details           
; 
 ? 
;

_diffrn_ambient_temperature      293(2)
_diffrn_radiation_probe          ?
_diffrn_radiation_type           MoK\a
_diffrn_radiation_wavelength     0.71073
_diffrn_source                   'fine-focus sealed tube'
_diffrn_radiation_monochromator  graphite
_diffrn_measurement_device       SMART
_diffrn_measurement_method       omega
_diffrn_standards_number         ?
_diffrn_standards_interval_count ?
_diffrn_standards_interval_time  ?
_diffrn_standards_decay_%        ?
_diffrn_reflns_number            9659
_diffrn_reflns_av_R_equivalents  0.0277
_diffrn_reflns_av_sigmaI/netI    0.0968
_diffrn_reflns_limit_h_min       -10
_diffrn_reflns_limit_h_max       10
_diffrn_reflns_limit_k_min       -17
_diffrn_reflns_limit_k_max       17
_diffrn_reflns_limit_l_min       -14
_diffrn_reflns_limit_l_max       19
_diffrn_reflns_theta_min         1.52
_diffrn_reflns_theta_max         28.00
_reflns_number_total             6662
_reflns_number_observed          3335
_reflns_observed_criterion       >2sigma(I)

_computing_data_collection       SMART
_computing_cell_refinement       SMART
_computing_data_reduction        SAINT
_computing_structure_solution    'SHELXS-86 (Sheldrick, 1990)'
_computing_structure_refinement  'SHELXL-93 (Sheldrick, 1993)'
_computing_molecular_graphics    ORTEP
_computing_publication_material  'MS WORD'

_refine_special_details          
; 
 Refinement on F^2^ for ALL reflections except for 0 with very negative F^2^ 
 or flagged by the user for potential systematic errors.  Weighted R-factors 
 wR and all goodnesses of fit S are based on F^2^, conventional R-factors R 
 are based on F, with F set to zero for negative F^2^. The observed criterion 
 of F^2^ > 2sigma(F^2^) is used only for calculating _R_factor_obs etc. and is 
 not relevant to the choice of reflections for refinement.  R-factors based 
 on F^2^ are statistically about twice as large as those based on F, and R- 
 factors based on ALL data will be even larger. 
;

_refine_ls_structure_factor_coef Fsqd
_refine_ls_matrix_type           full
_refine_ls_weighting_scheme      
'calc w=1/[\s^2^(Fo^2^)+(0.0803P)^2^+0.0000P] where P=(Fo^2^+2Fc^2^)/3'
_atom_sites_solution_primary     direct
_atom_sites_solution_secondary   difmap
_atom_sites_solution_hydrogens   geom
_refine_ls_hydrogen_treatment    riding
_refine_ls_extinction_method     none
_refine_ls_extinction_coef       ?
_refine_ls_number_reflns         6662
_refine_ls_number_parameters     309
_refine_ls_number_restraints     0
_refine_ls_R_factor_all          0.1166
_refine_ls_R_factor_obs          0.0529
_refine_ls_wR_factor_all         0.1664
_refine_ls_wR_factor_obs         0.1369
_refine_ls_goodness_of_fit_all   0.932
_refine_ls_goodness_of_fit_obs   1.104
_refine_ls_restrained_S_all      0.932
_refine_ls_restrained_S_obs      1.104
_refine_ls_shift/esd_max         0.000
_refine_ls_shift/esd_mean        0.000

loop_
_atom_site_label
_atom_site_type_symbol
_atom_site_fract_x
_atom_site_fract_y
_atom_site_fract_z
_atom_site_U_iso_or_equiv
_atom_site_thermal_displace_type
_atom_site_occupancy
_atom_site_calc_flag
_atom_site_refinement_flags
_atom_site_disorder_group
Cu1 Cu 0.07177(7) 0.34516(5) 0.27177(5) 0.0443(2) Uani 1 d . .
C1 C 0.0016(6) 0.2889(5) 0.1820(4) 0.0480(14) Uani 1 d . .
N1 N -0.0361(6) 0.2563(5) 0.1280(4) 0.071(2) Uani 1 d . .
C2 C 0.2001(6) 0.4792(5) 0.1840(4) 0.0436(13) Uani 1 d . .
N2 N 0.2713(6) 0.5548(4) 0.1281(4) 0.0632(14) Uani 1 d . .
C3 C -0.0997(6) 0.3768(5) 0.3711(4) 0.0448(13) Uani 1 d . .
N3 N -0.1697(6) 0.3902(6) 0.4383(5) 0.082(2) Uani 1 d . .
C4 C 0.1822(6) 0.2292(5) 0.3712(5) 0.0497(14) Uani 1 d . .
N4 N 0.2106(7) 0.1591(5) 0.4395(5) 0.092(2) Uani 1 d . .
Cu2 Cu 0.5000 0.5000 0.0000 0.0432(3) Uani 1 d S .
N21 N 0.6268(5) 0.4051(4) 0.1035(3) 0.0498(12) Uani 1 d . .
C21 C 0.5324(7) 0.3026(5) 0.1603(5) 0.066(2) Uani 1 d . .
H21A H 0.4441(7) 0.3111(5) 0.2107(5) 0.079 Uiso 1 calc R .
H21B H 0.6029(7) 0.2455(5) 0.1934(5) 0.079 Uiso 1 calc R .
C22 C 0.4640(8) 0.2747(5) 0.0859(5) 0.072(2) Uani 1 d . .
H22A H 0.5529(8) 0.2582(5) 0.0405(5) 0.086 Uiso 1 calc R .
H22B H 0.3935(8) 0.2114(5) 0.1213(5) 0.086 Uiso 1 calc R .
N22 N 0.3708(5) 0.3653(4) 0.0291(3) 0.0511(12) Uani 1 d . .
C23 C 0.3244(8) 0.3537(6) -0.0591(5) 0.070(2) Uani 1 d . .
H23A H 0.4229(8) 0.3447(6) -0.1030(5) 0.084 Uiso 1 calc R .
H23B H 0.2571(8) 0.2893(6) -0.0355(5) 0.084 Uiso 1 calc R .
C24 C 0.2327(8) 0.4492(7) -0.1173(5) 0.077(2) Uani 1 d . .
H24A H 0.1899(8) 0.4319(7) -0.1655(5) 0.093 Uiso 1 calc R .
H24B H 0.1403(8) 0.4624(7) -0.0718(5) 0.093 Uiso 1 calc R .
C25 C 0.6659(8) 0.4501(6) 0.1716(4) 0.067(2) Uani 1 d . .
H25A H 0.7246(8) 0.3969(6) 0.2185(4) 0.080 Uiso 1 calc R .
H25B H 0.5650(8) 0.4657(6) 0.2095(4) 0.080 Uiso 1 calc R .
Cu3 Cu 0.0000 0.5000 0.5000 0.0490(3) Uani 1 d S .
N31 N 0.1651(5) 0.5550(4) 0.3686(4) 0.0561(13) Uani 1 d . .
C31 C 0.1263(9) 0.6704(6) 0.3187(5) 0.077(2) Uani 1 d . .
H31A H 0.1749(9) 0.6960(6) 0.2480(5) 0.093 Uiso 1 calc R .
H31B H 0.1715(9) 0.7128(6) 0.3474(5) 0.093 Uiso 1 calc R .
C32 C -0.0543(9) 0.6834(6) 0.3319(5) 0.081(2) Uani 1 d . .
H32A H -0.0989(9) 0.6456(6) 0.2987(5) 0.097 Uiso 1 calc R .
H32B H -0.0807(9) 0.7592(6) 0.3026(5) 0.097 Uiso 1 calc R .
N32 N -0.1271(5) 0.6378(4) 0.4423(4) 0.0579(13) Uani 1 d . .
C33 C -0.3083(7) 0.6272(6) 0.4635(6) 0.077(2) Uani 1 d . .
H33A H -0.3387(7) 0.5826(6) 0.4318(6) 0.092 Uiso 1 calc R .
H33B H -0.3549(7) 0.6980(6) 0.4347(6) 0.092 Uiso 1 calc R .
C34 C -0.3793(7) 0.5780(7) 0.5744(6) 0.084(3) Uani 1 d . .
H34A H -0.3388(7) 0.6187(7) 0.6065(6) 0.100 Uiso 1 calc R .
H34B H -0.4972(7) 0.5856(7) 0.5841(6) 0.100 Uiso 1 calc R .
C35 C 0.3407(7) 0.5396(6) 0.3737(5) 0.075(2) Uani 1 d . .
H35A H 0.3696(7) 0.5802(6) 0.4096(5) 0.090 Uiso 1 calc R .
H35B H 0.4062(7) 0.5675(6) 0.3065(5) 0.090 Uiso 1 calc R .
Cu4 Cu 0.0000 0.0000 0.5000 0.0544(3) Uani 1 d S .
N41 N 0.1657(6) -0.0913(4) 0.4474(4) 0.0610(13) Uani 1 d . .
C41 C 0.1719(9) -0.0498(6) 0.3408(7) 0.092(2) Uani 1 d . .
H41A H 0.2211(9) -0.1026(6) 0.3142(7) 0.110 Uiso 1 calc R .
H41B H 0.2383(9) 0.0155(6) 0.3079(7) 0.110 Uiso 1 calc R .
C42 C 0.0009(10) -0.0261(6) 0.3213(6) 0.086(2) Uani 1 d . .
H42A H 0.0037(10) 0.0057(6) 0.2499(6) 0.103 Uiso 1 calc R .
H42B H -0.0635(10) -0.0923(6) 0.3498(6) 0.103 Uiso 1 calc R .
N42 N -0.0741(6) 0.0510(4) 0.3687(4) 0.0639(14) Uani 1 d . .
C43 C -0.2570(8) 0.0611(6) 0.3744(5) 0.086(3) Uani 1 d . .
H43A H -0.3085(8) -0.0093(6) 0.4132(5) 0.103 Uiso 1 calc R .
H43B H -0.2796(8) 0.0855(6) 0.3075(5) 0.103 Uiso 1 calc R .
C44 C -0.3313(8) 0.1405(6) 0.4225(6) 0.082(2) Uani 1 d . .
H44A H -0.2690(8) 0.2075(6) 0.3896(6) 0.099 Uiso 1 calc R .
H44B H -0.4425(8) 0.1561(6) 0.4120(6) 0.099 Uiso 1 calc R .
C45 C 0.3327(7) -0.0986(6) 0.4693(6) 0.084(2) Uani 1 d . .
H45A H 0.3980(7) -0.1456(6) 0.4408(6) 0.101 Uiso 1 calc R .
H45B H 0.3838(7) -0.0276(6) 0.4374(6) 0.101 Uiso 1 calc R .
O1 O 0.1056(9) 0.7655(6) 0.0456(6) 0.120(2) Uiso 0.80 d P .
O1' O 0.1051(52) 0.8997(38) -0.0426(33) 0.185(16) Uiso 0.20 d P .
O3 O 0.1909(31) 0.9351(20) 0.0790(18) 0.270(11) Uiso 0.50 d P .
O2 O 0.4332(37) 1.1234(23) -0.1780(20) 0.372(15) Uiso 0.70 d P .
O2' O 0.3444(56) 1.0814(39) -0.1934(33) 0.255(20) Uiso 0.30 d P .

loop_
_atom_site_aniso_label
_atom_site_aniso_U_11
_atom_site_aniso_U_22
_atom_site_aniso_U_33
_atom_site_aniso_U_23
_atom_site_aniso_U_13
_atom_site_aniso_U_12
Cu1 0.0405(4) 0.0494(4) 0.0412(4) -0.0156(3) -0.0071(3) -0.0018(3)
C1 0.042(3) 0.058(4) 0.045(3) -0.021(3) -0.006(3) -0.006(3)
N1 0.070(4) 0.084(4) 0.064(4) -0.034(3) -0.010(3) -0.008(3)
C2 0.042(3) 0.053(4) 0.036(3) -0.021(3) -0.002(2) 0.001(3)
N2 0.066(3) 0.063(4) 0.048(3) -0.010(3) -0.003(3) -0.014(3)
C3 0.039(3) 0.059(4) 0.044(3) -0.028(3) -0.006(3) -0.006(3)
N3 0.056(3) 0.133(6) 0.089(4) -0.076(4) -0.014(3) 0.005(3)
C4 0.038(3) 0.050(4) 0.059(4) -0.015(3) -0.012(3) -0.009(3)
N4 0.074(4) 0.063(4) 0.104(5) 0.017(4) -0.036(4) -0.012(3)
Cu2 0.0421(5) 0.0478(6) 0.0350(5) -0.0089(4) -0.0118(4) -0.0003(4)
N21 0.042(2) 0.063(3) 0.037(3) -0.012(2) -0.010(2) 0.008(2)
C21 0.052(4) 0.069(5) 0.052(4) 0.000(3) -0.009(3) 0.017(3)
C22 0.057(4) 0.048(4) 0.083(5) -0.006(4) 0.010(4) -0.005(3)
N22 0.043(2) 0.051(3) 0.053(3) -0.015(2) -0.005(2) 0.000(2)
C23 0.059(4) 0.085(5) 0.080(5) -0.051(4) -0.003(4) -0.010(4)
C24 0.055(4) 0.125(7) 0.078(5) -0.060(5) -0.032(4) 0.013(4)
C25 0.056(4) 0.106(6) 0.045(4) -0.034(4) -0.020(3) 0.020(4)
Cu3 0.0340(5) 0.0664(7) 0.0523(6) -0.0310(5) -0.0021(4) -0.0062(4)
N31 0.046(3) 0.076(4) 0.053(3) -0.035(3) 0.003(2) -0.016(2)
C31 0.090(5) 0.089(6) 0.051(4) -0.029(4) 0.004(4) -0.032(4)
C32 0.097(6) 0.077(5) 0.073(5) -0.021(4) -0.038(4) -0.001(4)
N32 0.047(3) 0.067(4) 0.069(4) -0.034(3) -0.016(3) 0.002(2)
C33 0.056(4) 0.095(6) 0.116(6) -0.072(5) -0.039(4) 0.017(4)
C34 0.033(3) 0.139(8) 0.122(7) -0.098(6) -0.012(4) 0.004(4)
C35 0.043(3) 0.118(7) 0.091(5) -0.077(5) 0.015(3) -0.030(4)
Cu4 0.0412(5) 0.0476(6) 0.0703(7) -0.0112(5) -0.0248(5) -0.0012(4)
N41 0.048(3) 0.055(3) 0.073(4) -0.014(3) -0.016(3) -0.002(2)
C41 0.081(5) 0.074(5) 0.122(7) -0.042(5) -0.013(5) -0.002(4)
C42 0.117(6) 0.077(5) 0.070(5) -0.022(4) -0.035(5) -0.015(5)
N42 0.054(3) 0.059(3) 0.075(4) -0.010(3) -0.034(3) -0.006(3)
C43 0.068(4) 0.072(5) 0.096(6) 0.014(4) -0.054(4) -0.024(4)
C44 0.047(4) 0.057(5) 0.124(7) -0.003(5) -0.039(4) -0.001(3)
C45 0.043(4) 0.074(5) 0.118(7) -0.019(5) -0.015(4) -0.004(3)

_geom_special_details            
; 
 All esds (except the esd in the dihedral angle between two l.s. planes) 
 are estimated using the full covariance matrix.  The cell esds are taken 
 into account individually in the estimation of esds in distances, angles 
 and torsion angles; correlations between esds in cell parameters are only 
 used when they are defined by crystal symmetry.  An approximate (isotropic) 
 treatment of cell esds is used for estimating esds involving l.s. planes. 
;

loop_
_geom_bond_atom_site_label_1
_geom_bond_atom_site_label_2
_geom_bond_distance
_geom_bond_site_symmetry_2
_geom_bond_publ_flag
Cu1 C1 1.967(6) . ?
Cu1 C3 1.982(6) . ?
Cu1 C2 1.988(6) . ?
Cu1 C4 2.007(6) . ?
C1 N1 1.156(7) . ?
C2 N2 1.138(7) . ?
C3 N3 1.118(6) . ?
C4 N4 1.136(7) . ?
Cu2 N21 2.016(4) . ?
Cu2 N21 2.016(4) 2_665 ?
Cu2 N22 2.028(5) 2_665 ?
Cu2 N22 2.028(5) . ?
N21 C25 1.463(7) . ?
N21 C21 1.485(8) . ?
C21 C22 1.517(9) . ?
C22 N22 1.463(7) . ?
N22 C23 1.505(7) . ?
C23 C24 1.501(9) . ?
C24 C25 1.493(10) 2_665 ?
C25 C24 1.493(10) 2_665 ?
Cu3 N31 2.034(4) . ?
Cu3 N31 2.034(4) 2_566 ?
Cu3 N32 2.040(5) 2_566 ?
Cu3 N32 2.040(5) . ?
N31 C31 1.482(8) . ?
N31 C35 1.482(7) . ?
C31 C32 1.488(9) . ?
C32 N32 1.507(8) . ?
N32 C33 1.487(7) . ?
C33 C34 1.512(10) . ?
C34 C35 1.511(10) 2_566 ?
C35 C34 1.511(10) 2_566 ?
Cu4 N42 2.011(5) 2_556 ?
Cu4 N42 2.011(5) . ?
Cu4 N41 2.025(5) . ?
Cu4 N41 2.025(5) 2_556 ?
N41 C41 1.446(9) . ?
N41 C45 1.485(7) . ?
C41 C42 1.505(10) . ?
C42 N42 1.504(8) . ?
N42 C43 1.513(7) . ?
C43 C44 1.536(10) . ?
C44 C45 1.475(9) 2_556 ?
C45 C44 1.475(9) 2_556 ?
O1 O1' 1.77(5) . ?
O2 O2' 1.07(5) . ?

loop_
_geom_angle_atom_site_label_1
_geom_angle_atom_site_label_2
_geom_angle_atom_site_label_3
_geom_angle
_geom_angle_site_symmetry_1
_geom_angle_site_symmetry_3
_geom_angle_publ_flag
C1 Cu1 C3 117.9(2) . . ?
C1 Cu1 C2 106.3(2) . . ?
C3 Cu1 C2 109.1(2) . . ?
C1 Cu1 C4 110.2(2) . . ?
C3 Cu1 C4 96.4(2) . . ?
C2 Cu1 C4 117.3(2) . . ?
N1 C1 Cu1 178.5(5) . . ?
N2 C2 Cu1 175.1(5) . . ?
N3 C3 Cu1 164.9(5) . . ?
N4 C4 Cu1 164.9(5) . . ?
N21 Cu2 N21 179.999(1) . 2_665 ?
N21 Cu2 N22 93.4(2) . 2_665 ?
N21 Cu2 N22 86.6(2) 2_665 2_665 ?
N21 Cu2 N22 86.6(2) . . ?
N21 Cu2 N22 93.4(2) 2_665 . ?
N22 Cu2 N22 180.0 2_665 . ?
C25 N21 C21 110.8(5) . . ?
C25 N21 Cu2 116.6(4) . . ?
C21 N21 Cu2 106.9(3) . . ?
N21 C21 C22 107.4(5) . . ?
N22 C22 C21 110.1(5) . . ?
C22 N22 C23 114.0(5) . . ?
C22 N22 Cu2 105.8(4) . . ?
C23 N22 Cu2 116.6(4) . . ?
C24 C23 N22 112.7(5) . . ?
C25 C24 C23 113.8(5) 2_665 . ?
N21 C25 C24 112.3(5) . 2_665 ?
N31 Cu3 N31 180.0 . 2_566 ?
N31 Cu3 N32 93.1(2) . 2_566 ?
N31 Cu3 N32 86.9(2) 2_566 2_566 ?
N31 Cu3 N32 86.9(2) . . ?
N31 Cu3 N32 93.1(2) 2_566 . ?
N32 Cu3 N32 180.0 2_566 . ?
C31 N31 C35 111.8(5) . . ?
C31 N31 Cu3 105.3(4) . . ?
C35 N31 Cu3 117.3(4) . . ?
N31 C31 C32 109.5(6) . . ?
C31 C32 N32 108.5(5) . . ?
C33 N32 C32 112.9(5) . . ?
C33 N32 Cu3 116.8(4) . . ?
C32 N32 Cu3 104.8(4) . . ?
N32 C33 C34 112.3(5) . . ?
C35 C34 C33 115.1(5) 2_566 . ?
N31 C35 C34 111.6(5) . 2_566 ?
N42 Cu4 N42 179.997(1) 2_556 . ?
N42 Cu4 N41 92.9(2) 2_556 . ?
N42 Cu4 N41 87.1(2) . . ?
N42 Cu4 N41 87.1(2) 2_556 2_556 ?
N42 Cu4 N41 92.9(2) . 2_556 ?
N41 Cu4 N41 179.999(1) . 2_556 ?
C41 N41 C45 110.9(6) . . ?
C41 N41 Cu4 105.7(4) . . ?
C45 N41 Cu4 118.0(4) . . ?
N41 C41 C42 109.2(6) . . ?
N42 C42 C41 108.1(6) . . ?
C42 N42 C43 112.7(6) . . ?
C42 N42 Cu4 105.0(4) . . ?
C43 N42 Cu4 115.8(4) . . ?
N42 C43 C44 111.9(6) . . ?
C45 C44 C43 112.8(6) 2_556 . ?
C44 C45 N41 112.5(6) 2_556 . ?

_refine_diff_density_max         0.608
_refine_diff_density_min         -0.365
_refine_diff_density_rms         0.103
